# Supplementary material for: Comparative Study on the Immunogenicity of COVID-19 mRNA Vaccines in Patients Receiving Adjuvant and Palliative Chemotherapy
Source: PubMed Central journal article supplement — Chonnam Med J. 2024 Jan 25;60(1):69–77. doi: 10.4068/cmj.2024.60.1.69 (PMC10828089; doi:10.4068/cmj.2024.60.1.69), 2024-01-25
Supplement: cmj-60-69-s001.pdf [file cmj-60-69-s001.pdf]

**Supplementary Table 1.** Comparison of anti-RBD IgG binding antibody and neutralizing antibody responses after the first and second doses of COVID-19 mRNA vaccines between healthy controls and patients with solid cancers receiving adjuvant or palliative chemotherapy

|                                             | Healthy controls        | Cancer patients         | $P^{*,\dagger}$ | Adjuvant group          | Palliative group        | $P^{*,\ddagger}$ |
|---------------------------------------------|-------------------------|-------------------------|-----------------|-------------------------|-------------------------|------------------|
| Before vaccination (baseline), n            | 24                      | 45                      |                 | 23                      | 22                      |                  |
| Anti-RBD IgG antibody, BAU/mL, median (IQR) | 0.6 (0.4 – 1.0)         | 0.5 (0.2 – 1.1)         | 0.562           | 0.5 (0.2 – 1.1)         | 0.6 (0.2 – 1.1)         | 0.706            |
| Neutralizing antibody, IU/mL, median (IQR)  | 22.8 (21.2 – 25.3)      | 15.8 (13.2 – 19.3)      | < 0.001         | 15.7 (12.3 – 20.2)      | 16.4 (14.0 – 19.3)      | 0.742            |
| 2-4 weeks after first dose, n               | 24                      | 38                      |                 | 20                      | 18                      |                  |
| Anti-RBD IgG antibody                       |                         |                         |                 |                         |                         |                  |
| Positive, n (%)                             | 24 (100)                | 22 (57.9)               | < 0.001         | 12 (60.0)               | 10 (55.6)               | 1.000            |
| BAU/mL, median (IQR)                        | 156.4 (60.5 – 230.0)    | 13.3 (2.6 – 78.2)       | < 0.001         | 16.5 (2.6 – 76.6)       | 12.6 (2.6 – 84.0)       | 0.804            |
| BNT162b2                                    | 50.8 (12.1 – 181.2)     | 5.2 (1.6 – 26.3)        | 0.007           | 4.2 (0.9 – 32.8)        | 11.8 (2.5 – 48.7)       | 0.489            |
| mRNA-1273                                   | 183.5 (145.3 – 368.1)   | 59.9 (3.4 – 156.2)      | 0.002           | 75.8 (12.5 – 187.4)     | 46.7 (2.5 – 130.3)      | 0.362            |
| $P^{\S}$                                    | 0.007                   | 0.019                   |                 | 0.012                   | 0.546                   |                  |
| Neutralizing antibody                       |                         |                         |                 |                         |                         |                  |
| Positive, n (%)                             | 23 (95.8)               | 18 (47.4)               | < 0.001         | 11 (55.0)               | 7 (38.9)                | 0.352            |
| IU/mL, median (IQR)                         | 100.3 (50.4 – 127.9)    | 28.1 (21.8 – 47.2)      | < 0.001         | 30.5 (18.6 – 43.1)      | 27.3 (21.8 – 60.1)      | 0.930            |
| BNT162b2                                    | 51.2 (39.2 – 122.7)     | 23.9 (15.5 – 32.3)      | 0.002           | 17.2 (12.7 – 30.5)      | 24.2 (21.8 – 46.3)      | 0.258            |
| mRNA-1273                                   | 112.0 (88.4 – 202.4)    | 40.0 (25.7 – 111.9)     | 0.004           | 40.8 (28.0 – 85.6)      | 28.0 (21.8 – 168.7)     | 0.676            |
| $P^{\S}$                                    | 0.024                   | 0.008                   |                 | 0.005                   | 0.387                   |                  |
| 2-4 weeks after second dose, n              | 24                      | 39                      |                 | 20                      | 19                      |                  |
| Anti-RBD IgG antibody                       |                         |                         |                 |                         |                         |                  |
| Positive, N (%)                             | 24 (100)                | 39 (100)                |                 | 20 (100)                | 19 (100)                |                  |
| BAU/mL, median (IQR)                        | 2081.0 (853.2 – 3074.0) | 1377.0 (397.7 – 2996.0) | 0.298           | 1575.0 (447.2 – 4508.0) | 1005.0 (391.1 – 2380.0) | 0.384            |

|                       |                          |                          |       |                          |                          |       |
|-----------------------|--------------------------|--------------------------|-------|--------------------------|--------------------------|-------|
| BNT162b2              | 767.1 (545.7 – 2072.0)   | 555.0 (283.6 – 1400.5)   | 0.134 | 578.9 (352.3 – 1574.6)   | 476.4 (91.9 – 1304)      | 0.500 |
| mRNA-1273             | 2565.1 (1976.4 – 3376.9) | 2697.8 (1886.5 – 4849.6) | 0.531 | 2969.9 (1250.1 – 5680.0) | 2379.9 (2098.6 – 3030.6) | 0.650 |
| <i>P</i> <sup>§</sup> | 0.005                    | < 0.001                  |       | 0.027                    | 0.008                    |       |
| Neutralizing antibody |                          |                          |       |                          |                          |       |
| Positive, n (%)       | 24 (100)                 | 39 (100)                 |       | 20 (100)                 | 19 (100)                 |       |
| IU/mL, median (IQR)   | 1244.6 (813.0 – 1858.1)  | 843.2 (285.6 – 1555.0)   | 0.091 | 721.7 (289.6 – 1507.0)   | 1118.0 (202.4 – 1891.0)  | 0.811 |
| BNT162b2              | 1073.0 (583.7 – 1628.0)  | 351.6 (196.0 – 1073.0)   | 0.033 | 322.1 (268.4 – 770.3)    | 382.0 (75.3 – 1396.0)    | 0.859 |
| mRNA-1273             | 1378.4 (1040.0 – 1946.0) | 1460.2 (705.7 – 2070.0)  | 0.894 | 1365.7 (455.0 – 2047.0)  | 1891.2 (945.4 – 2142.0)  | 0.469 |
| <i>P</i> <sup>§</sup> | 0.306                    | 0.002                    |       | 0.040                    | 0.031                    |       |

\*Comparisons of categorical variables were performed using the Fisher exact test. The Mann-Whitney test was used for comparing continuous variables. A two-sided *P*-value < 0.05 was considered statistically significant; †control vs. cancer group; ‡adjuvant vs. palliative group. §Comparison of antibody levels between the BNT162b2 and mRNA-1273 vaccines was performed using the Mann-Whitney test. Abbreviations: BAU/mL, binding antibody unit per milliliter; IQR, interquartile range; IU/mL, international unit per milliliter; n, number; RBD-IgG, receptor-binding domain-specific immunoglobulin.
