# Supplementary material for: Comparative Study on the Immunogenicity of COVID-19 mRNA Vaccines in Patients Receiving Adjuvant and Palliative Chemotherapy
Source: PubMed Central journal article supplement — Chonnam Med J. 2024 Jan 25;60(1):69–77. doi: 10.4068/cmj.2024.60.1.69 (PMC10828089; doi:10.4068/cmj.2024.60.1.69), 2024-01-25
Supplement: cmj-60-69-s002.pdf [file cmj-60-69-s002.pdf]

**Supplementary Table 2.** Comparison of humoral response by interval between vaccine and chemotherapy

| Humoral Responses after the first vaccination     |                       |                       |          |
|---------------------------------------------------|-----------------------|-----------------------|----------|
| Chemotherapy to first vaccination                 | ≥14 days (n=6)        | < 14 days (n=27)      | <i>P</i> |
| Anti-RBD IgG antibody, BAU/mL, median (IQR)       | 28.6 (1.2-101.5)      | 13.4 (3.2-76.9)       | 0.768    |
| Neutralizing antibody, IU/mL, median (IQR)ntibody | 25.8 (17.1-146.7)     | 28.9 (21.9-43.8)      | 0.838    |
| First vaccination to next chemotherapy            | ≥14 days (n=4)        | < 14 days (n=29)      |          |
| Anti-RBD IgG antibody, BAU/mL, median (IQR)       | 83.2 (20.4-145.3)     | 13.1 (2.5-65.2)       | 0.184    |
| Neutralizing antibody, IU/mL, median (IQR)ntibody | 127.1 (27.0-364.5)    | 28.0 (20.0-42.3)      | 0.119    |
| Humoral Responses after the second vaccination    |                       |                       |          |
| Chemotherapy to second vaccination                | ≥14 days (n=6)        | < 14 days (n=28)      | <i>P</i> |
| Anti-RBD IgG antibody, BAU/mL, median (IQR)       | 1217.9 (260.8-2479.2) | 1096.6 (403.3-3015.4) | 0.439    |
| Neutralizing antibody, IU/mL, median (IQR)ntibody | 749.9 (168.6-1989.9)  | 821.4 (289.6-1467.3)  | 0.741    |
| Second vaccination to next chemotherapy           | ≥14 days (n=8)        | < 14 days (n=26)      |          |
| Anti-RBD IgG antibody, BAU/mL, median (IQR)       | 887.3 (347.9-2823.9)  | 1096.6 (412.7-2985.1) | 0.676    |
| Neutralizing antibody, IU/mL, median (IQR)ntibody | 449.9 (184.2-1933.7)  | 987.1                 | 0.618    |
