# Supplementary material for: Comparative Study on the Immunogenicity of COVID-19 mRNA Vaccines in Patients Receiving Adjuvant and Palliative Chemotherapy
Source: PubMed Central journal article supplement — Chonnam Med J. 2024 Jan 25;60(1):69–77. doi: 10.4068/cmj.2024.60.1.69 (PMC10828089; doi:10.4068/cmj.2024.60.1.69), 2024-01-25
Supplement: cmj-60-69-s003.pdf [file cmj-60-69-s003.pdf]

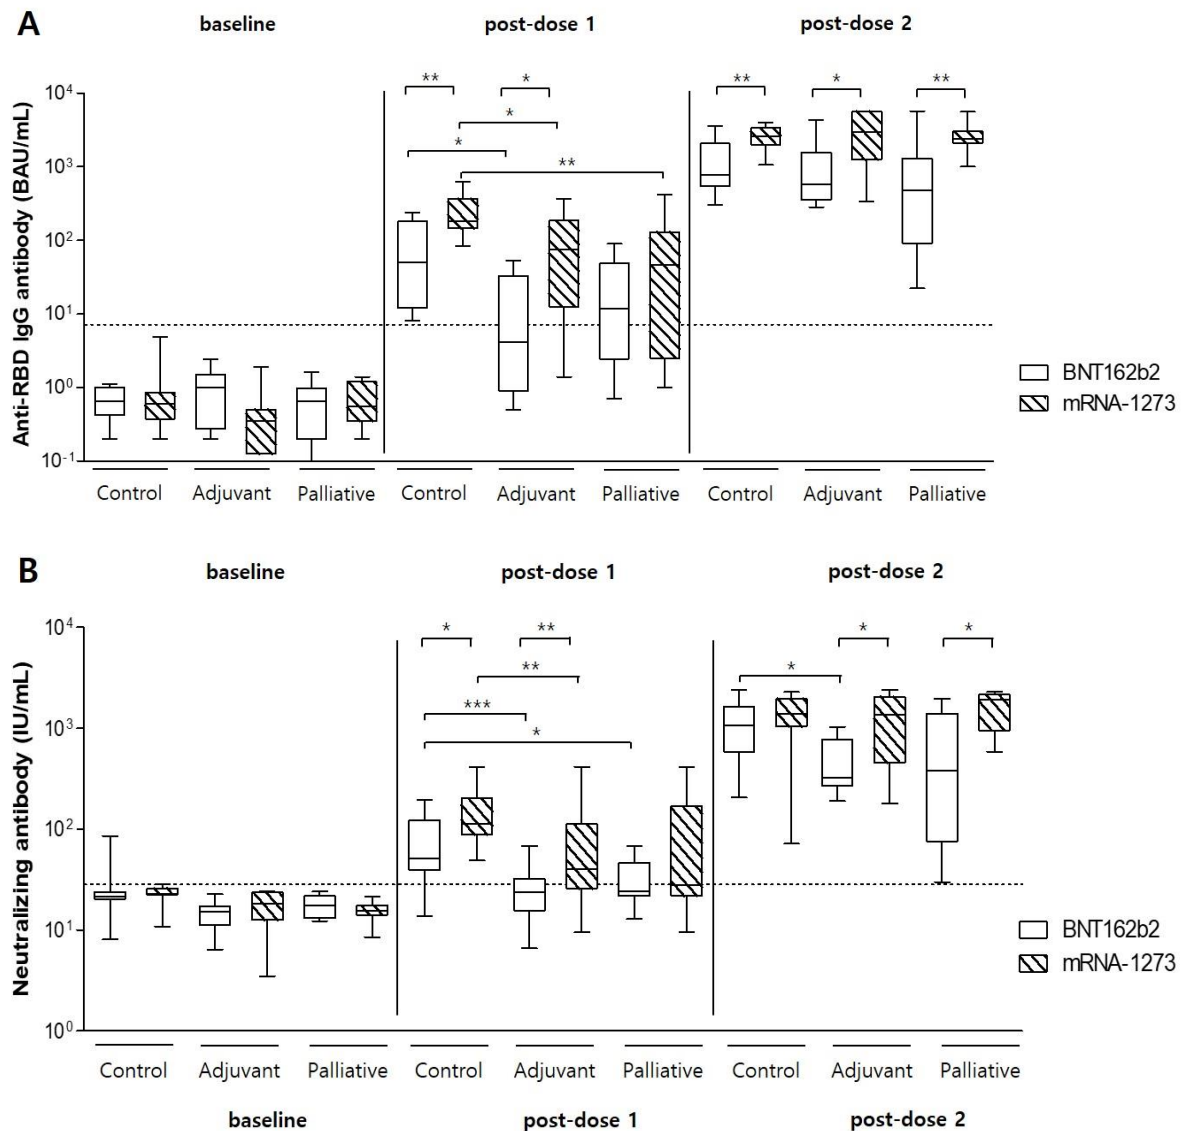

**Supplementary Figure 1.** (A) The anti-RBD IgG binding antibody and (B) neutralizing antibody levels before (baseline) and after the first (post-dose 1) and second (post-dose 2) vaccination of each COVID-19 mRNA vaccine, BNT162b2 and mRNA-1273, in the control, adjuvant, and palliative groups. The levels are on the logarithmic scale and indicated as a scatter dot-plot with median and interquartile ranges. The dotted lines are the threshold for positivity suggested by the manufacturers for conversion to the World Health Organization's standard units (A: 7.1 BAU/mL, B: 28.4 IU/mL). \*,  $P < 0.05$ ; \*\*,  $P < 0.01$ ; \*\*\*,  $P < 0.001$ .
